# Supplementary material for: The Aftermath of Long-Term Cigarette Smoking on Telomere Length and Mitochondrial DNA Copy Number in Human Cumulus Cells Prior to In Vitro Fertilization—A Pilot Study
Source: MDPI journal article supplement (doi:10.3390/antiox11091841), 2022-09-19
Supplement: s1 [file s1]

# Supplementary Materials

Table S1. Real-Time PCR Primer Sequences and cycling conditions

| Primer to Analyze          | TERF1<br>Gene Accession Number:<br>NM_017489 | TERF2<br>Gene Accession Number: NM_005652 | POT1<br>Gene Accession Number:<br>NM_015450 | GAPDH<br>Gene Accession Number:<br>NM_002046 |
|----------------------------|----------------------------------------------|-------------------------------------------|---------------------------------------------|----------------------------------------------|
| Forward PCR Primer         | 5'-<br>CCACATGATGGAGAAAATTAA<br>GAGTTAT- 3'  | 5'- ACCAGGGCC<br>TGTGGAAAAG- 3'           | 5'-<br>CAGAACCTGACG<br>ACAGCTTTCC- 3'       | 5'- AAGGTG<br>AAGGTCGGA<br>GTCAAC- 3'        |
| Reverse PCR Primer         | 5'- TGCCGCTGCCTTCATTAGA-<br>3'               | 5'- GGTGGTTGGAGG<br>ATT CCG TA-3'         | 5'-<br>GCACATAGTGGT<br>GTCCTCTCCA-3'        | 5'- GGGGTCATT<br>GATGGCAAC<br>AATA-3'        |
| Annealing Temperature (°C) | 60°C for 1 min                               |                                           |                                             |                                              |

Table S2. Stem-loop microRNA Primer Sequences

| Name              | MicroRNA Accession Number                     | Primer Sequences (5'-3')                                 |
|-------------------|-----------------------------------------------|----------------------------------------------------------|
| RT_miR-155        | hsa-miR-155-5p<br>(MIMAT000064<br>6, miRBase) | GTTGGCTCTGGTGCAGGGTCCGAGGTATTCGCACCAGAGCCAACACCCC<br>T   |
| miR-155_Forward   |                                               | GCGGCGGTAAATGCTAATCGTG                                   |
| RT_miR-23a        | hsa-miR-23a-3p<br>(MIMAT000007<br>8, miRBase) | GTTGGCTCTGGTGCAGGGTCCGAGGTATTCGCACCAGAGCCAACGGAA<br>AT   |
| miR-23a_Forward   |                                               | GCGGCGGATCACATTGCCAGG                                    |
| RT_miR-185        | hsa-miR-185-5p<br>(MIMAT000045<br>5, miRBase) | GTTGGCTCTGGTGCAGGGTCCGAGGTATTCGCACCAGAGCCAACCTCAGG<br>A  |
| miR-185_Forward   |                                               | GCGGCGGTGGAGAGAAAGGCA                                    |
| RT_RNU44          | RNU44<br>(NR_002750,<br>NCBI)                 | GTTGGCTCTGGTGCAGGGTCCGAGGTATTCGCACCAGAGCCAACAGTCA<br>GTT |
| RNU44_Forward     |                                               | GCGGCGCCTGGATGATGATAG                                    |
| Universal Reverse |                                               | GTGCAGGGTCCGAGGT                                         |

TRF1

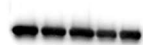

2176

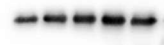

2180

TRF2

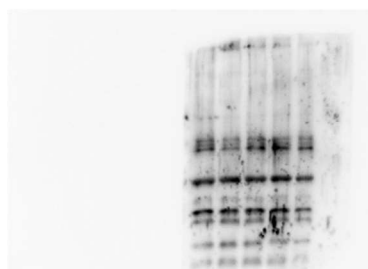

2166

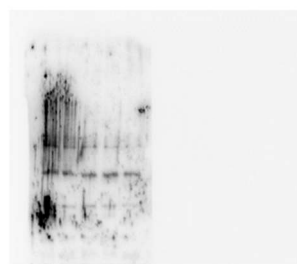

2167

POT1

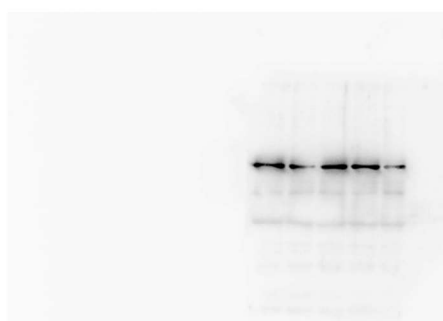

2214

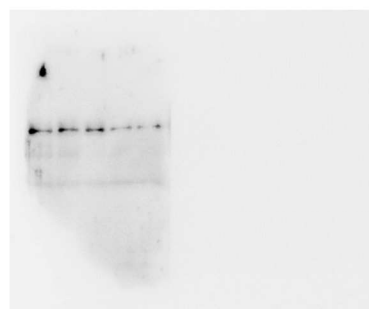

2209

$\beta$ -actin

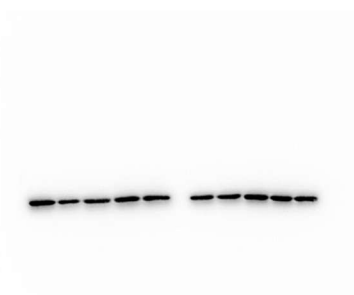

2200

Figure S1. Full-size Western Blot membranes for all studied proteins
